# Supplementary material for: Disordering of Starch Films as a Factor Influencing the Release Rate of Biologically Active Substances
Source: MDPI journal article supplement (doi:10.3390/polym15102303), 2023-05-13
Supplement: s1 [file s1]

# Disordering of Starch Films as a Factor Influencing the Release Rate of Biologically Active Substances

Ekaterina Podgorbunskikh <sup>1,\*</sup>, Timofei Kuskov <sup>1,2</sup>, Anna Matveeva <sup>1</sup>, Artem Ulihin <sup>1</sup>, Aleksey Bychkov <sup>1,3</sup>, Igor Lomovskiy <sup>1</sup> and Yuliya Polienko <sup>4</sup>

<sup>1</sup> Institute of Solid State Chemistry and Mechanochemistry SB RAS, 18 Kutateladze Str., 630090 Novosibirsk, Russia; t.kuskov@g.nsu.ru (T.K.); matveeva@solid.nsc.ru (A.M.); ulikhin@solid.nsc.ru (A.U.); bychkov.a.l@gmail.com (A.B.); lomovsky@solid.nsc.ru (I.L.)

<sup>2</sup> Department of Natural Sciences, Novosibirsk State University, 2 Pirogova Str., 630090 Novosibirsk, Russia

<sup>3</sup> Department of Business, Novosibirsk State Technical University, 20 Prospekt K. Marksa, 630073 Novosibirsk, Russia

<sup>4</sup> Laboratory of Nitrogen Compounds, N. N. Vorozhtsov Novosibirsk Institute of Organic Chemistry SB RAS, 9 Lavrentiev Ave., 630090 Novosibirsk, Russia; polienko@nioch.nsc.ru

\* Correspondence: podgorbunskikh@solid.nsc.ru

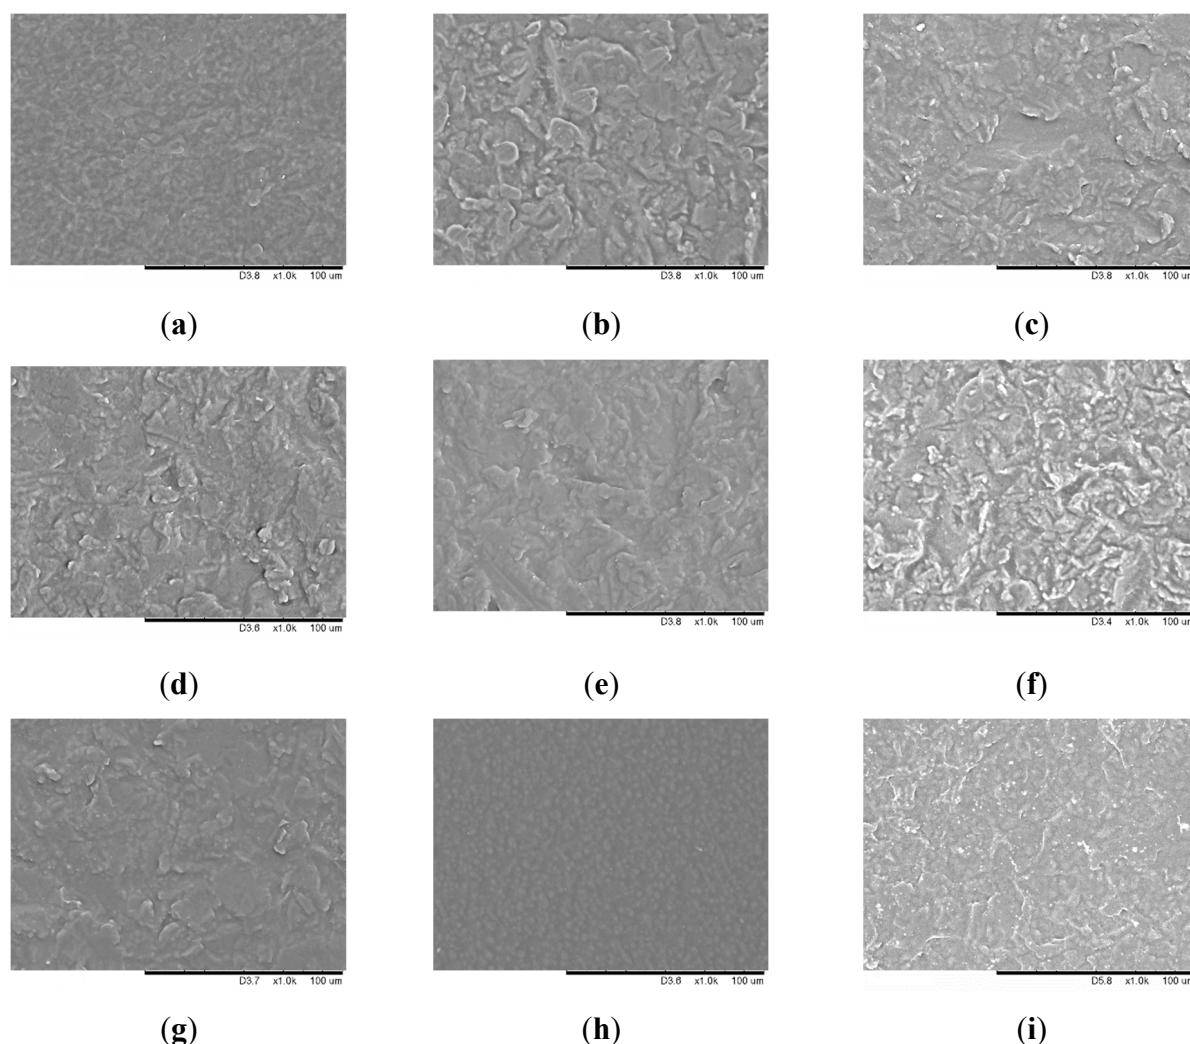

**Figure S1.** Micro images of native starch films and films prepared from starch treated mechanically for 30 and 600 s: corn (a–c), potato (d–f), and tapioca starch (g–i).

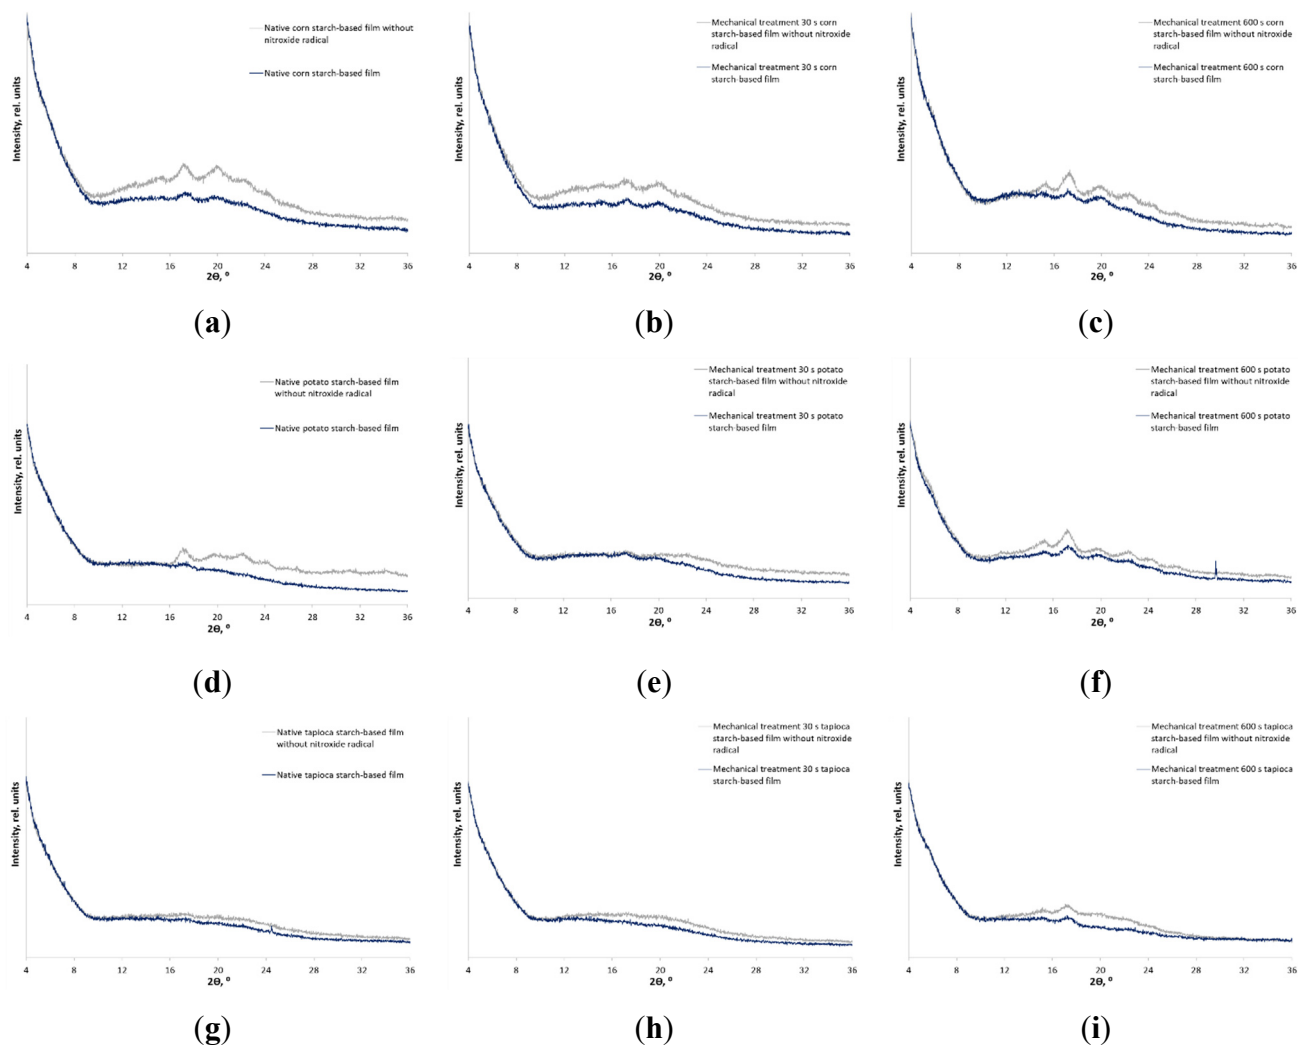

**Figure S2.** X-ray diffraction patterns of the films based on native starch and starch mechanically treated for 30 and 600 s with and without 3-carboxy-PROXYL added: corn (a–c), potato (d–f), and tapioca starch (g–i).

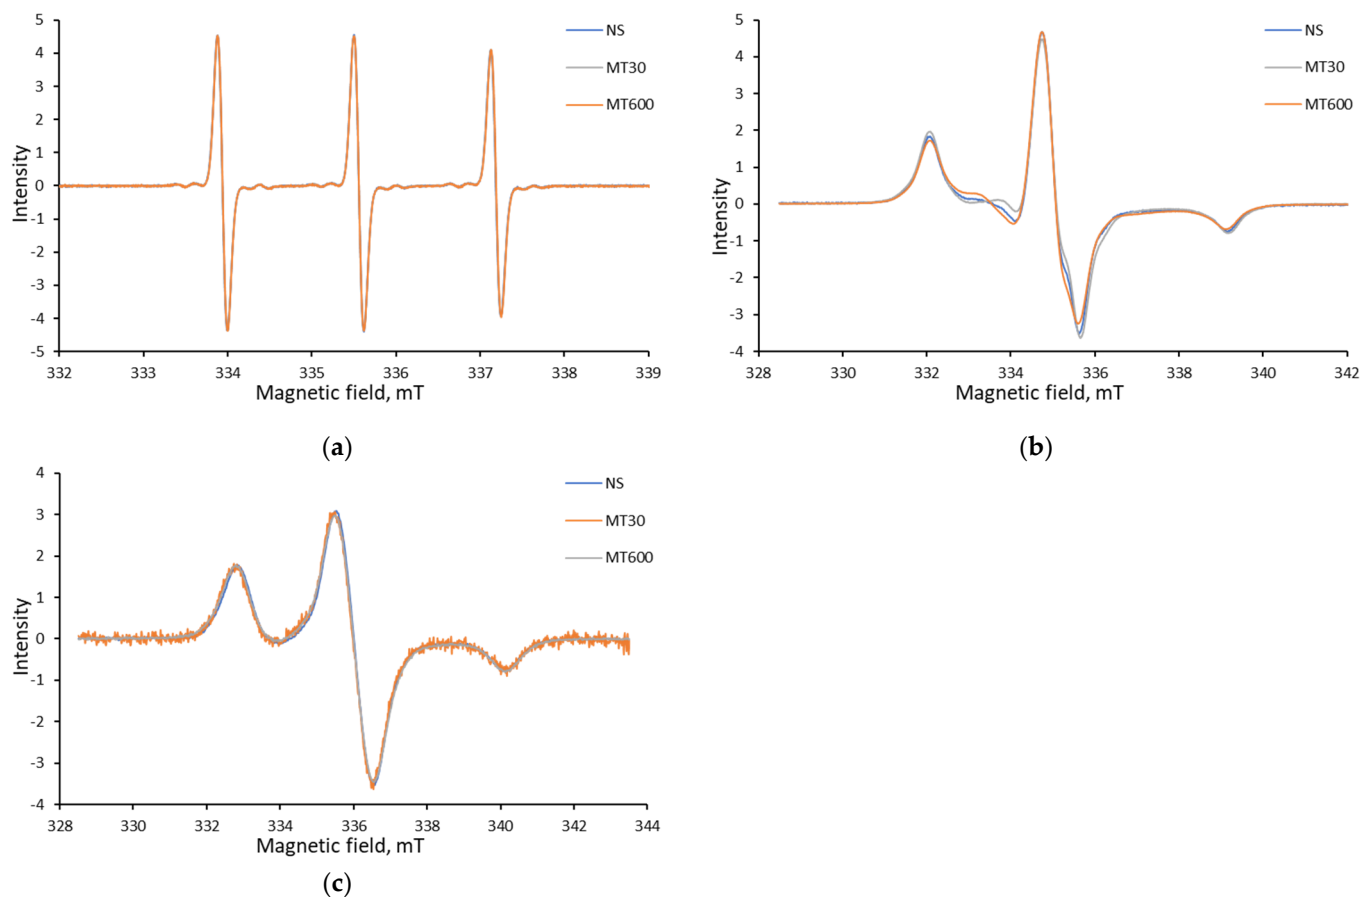

**Figure S3.** The characteristic EPR spectra of 3-carboxy-PROXYL nitroxide radical for corn starch: in the liquid state (a); in the film at room temperature (b); and the stabilized spectrum at  $-196^{\circ}\text{C}$  (c).

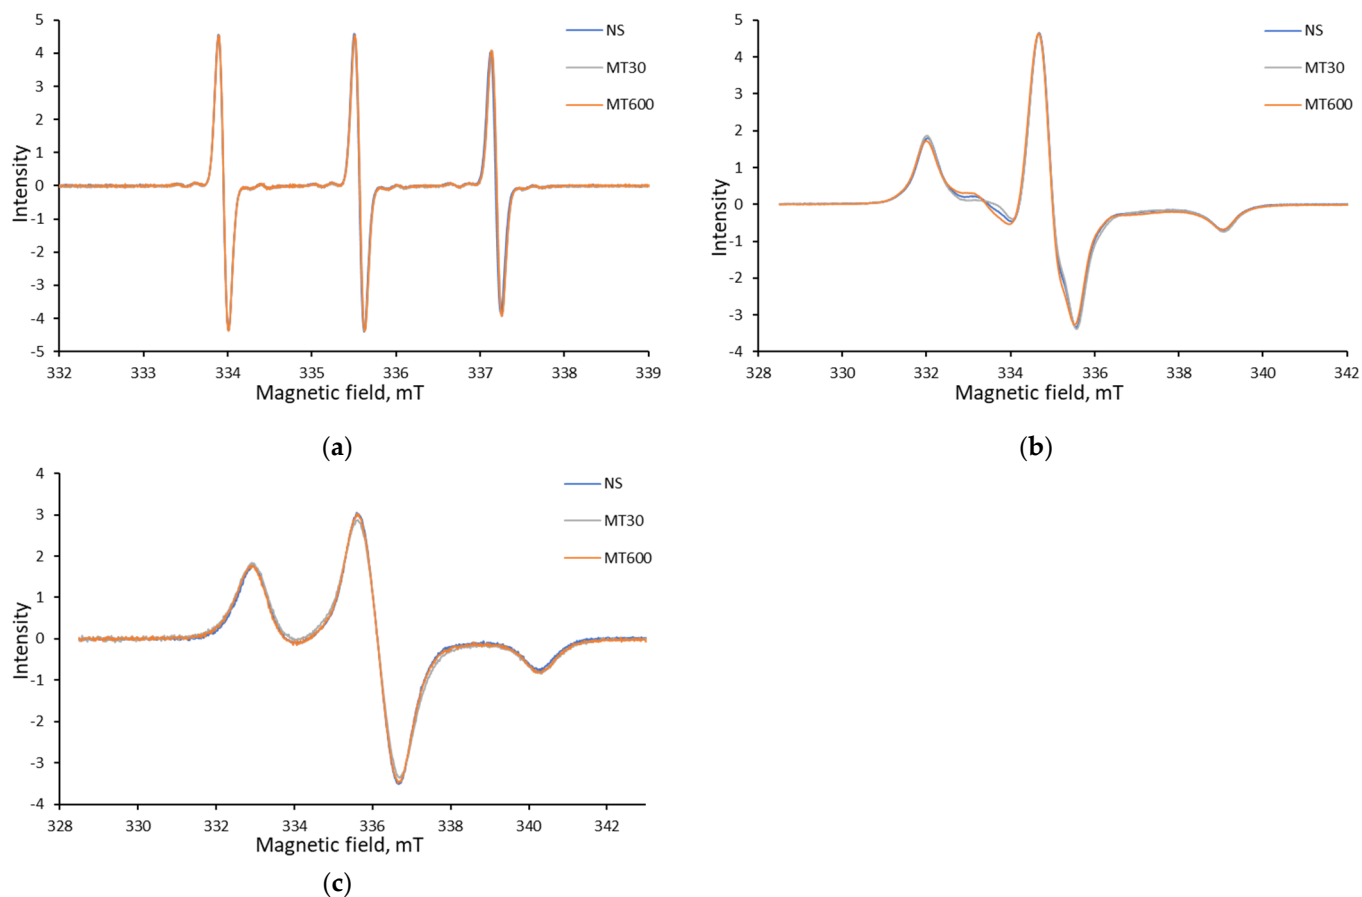

**Figure S4.** The characteristic EPR spectra of 3-carboxy-PROXYL nitroxide radical for tapioca starch: in the liquid state (a); in the film at room temperature (b); and the stabilized spectrum at  $-196^{\circ}\text{C}$  (c).

**Table S1.** The key physicochemical characteristics of films based on native starch and starch with different disordering degrees (without 3-carboxy-PROXYL added).

| Starting material         | Type   | Crystallinity index, %  | Film thickness, $\mu\text{m}$ |
|---------------------------|--------|-------------------------|-------------------------------|
| Corn starch-based film    |        |                         |                               |
| NS <sup>1</sup>           | A-type | $19 \pm 1$              | $118 \pm 8$                   |
| MT30 <sup>2</sup>         | A-type | $11 \pm 1$              | $85 \pm 3$                    |
| MT600 <sup>3</sup>        | B-type | $22 \pm 1$ <sup>a</sup> | $89 \pm 12$ <sup>b</sup>      |
| Potato starch-based film  |        |                         |                               |
| NS                        | B-type | $25 \pm 1$              | $143 \pm 8$                   |
| MT30                      | B-type | $17 \pm 1$              | $88 \pm 4$                    |
| MT600                     | B-type | $26 \pm 2$ <sup>a</sup> | $91 \pm 6$ <sup>b</sup>       |
| Tapioca starch-based film |        |                         |                               |
| NS                        | C-type | $11 \pm 1$              | $136 \pm 14$                  |
| MT30                      | C-type | $8 \pm 1$ <sup>a</sup>  | $75 \pm 15$                   |
| MT600                     | B-type | $19 \pm 1$              | $70 \pm 5$ <sup>b</sup>       |

Data are presented as mean  $\pm$  SD. <sup>1</sup> NS – native starch; <sup>2</sup> MT30 – starch after mechanical treatment for 30 s; <sup>3</sup> MT600 – starch after mechanical treatment for 600 s. <sup>a</sup> No significant differences compared to NS samples ( $p$ -value  $\geq 0.05$ ). <sup>b</sup> No significant differences compared to MT30 samples ( $p$ -value  $\geq 0.05$ ).
